# Supplementary material
Source: Springer Nature journal article supplement (https://www.springermedizin.de/resource/supplementary/12933_2009_204_MOESM2_ESM.pdf/9539834)

**Total number of Plaques**

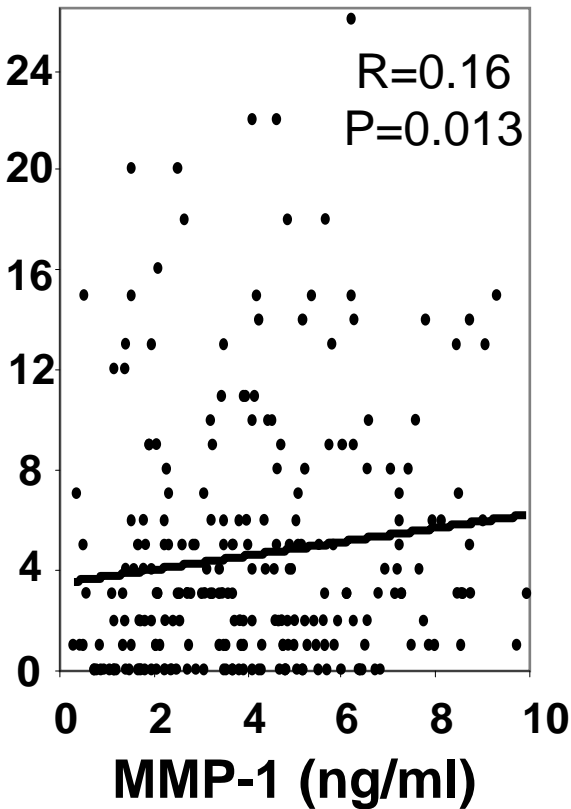

Supplement: MOESM2 [file 9539834]
